# Supplementary material for: Peak intensity prediction in MALDI-TOF mass spectrometry: A machine learning study to support quantitative proteomics
Source: PubMed Central journal article supplement (PMC2600826; doi:10.1186/1471-2105-9-443), 2008-10-20
Supplement: 1471-2105-9-443-S3.pdf [file 1471-2105-9-443-S3.pdf]

| coding region | MOWSE score                            | name  | description                                                           | GenDB ID |
|---------------|----------------------------------------|-------|-----------------------------------------------------------------------|----------|
| cg0040        | 123<br>72<br>80<br>88<br>89<br>90      |       | PUTATIVE SECRETED PROTEIN                                             | 2631     |
| cg0482        | 74                                     | gpmA  | PHOSPHOGLYCEROMUTASE 1 (EC 5.4.2.1)                                   | 127      |
| cg0700        | 73                                     | guaB3 | IMP dehydrogenase / GMP reductase C terminus                          | 3013     |
| cg0755        | 154                                    | metY  | O-acetylhomoserine sulfhydrylase                                      | 1136     |
| cg1111        | 76<br>77<br>79<br>80                   | eno   | ENOLASE (EC 4.2.1.11) (2-PHOSPHOGLYCERATE DEHYDRAT                    | 973      |
| cg1145        | 85                                     | fum   | FUMARATE HYDRATASE (EC 4.2.1.2)                                       | 5        |
| cg1380        | 72                                     | ssuA  | ABC-type aliphatic sulfonate transporter, substrate-binding protein   | 1087     |
| cg1514        | 70                                     |       | secreted protein                                                      | 1513     |
| cg1735        | 121<br>130<br>141<br>166<br>170<br>173 |       | secreted cell wall-associated hydrolase (invasion-associated protein) | 2421     |
| cg1763        | 101<br>75                              | sufD  | components of an uncharacterized iron-regulated ABC-type transporter  | 852      |
| cg1774        | 69                                     | tkt   | TRANSKETOLASE (EC 2.2.1.1)                                            | 2589     |
| cg1790        | 67<br>92                               | pgk   | PHOSPHOGLYCERATE KINASE (EC 2.7.2.3)                                  | 489      |
| cg1791        | 104<br>111                             | gap   | GLYCERALDEHYDE-3-PHOSPHATE DEHYDROGENASE (EC 1.2.1)                   | 1677     |

| coding region | MOWSE score                               | name | description                                                           | GenDB ID |
|---------------|-------------------------------------------|------|-----------------------------------------------------------------------|----------|
| cg2052        | 66<br>74<br>75<br>77                      |      | putative secreted protein                                             | 524      |
| cg2057        | 68                                        |      | putative secreted protein                                             | 376      |
| cg2221        | 111                                       | tsf  | TRANSLATION ELONGATION FACTOR TS (EF-TS)                              | 2983     |
| cg2361        | 75<br>75                                  |      | Cell division initiation protein - Antigen 84 homolog                 | 2846     |
| cg2401        | 88                                        |      | SECRETED PROTEIN NLP/P60 FAMILY, PUTATIVE PEPTIDOGLYCAN LYTIC PROTEIN | 4414     |
| cg2591        | 77                                        | dkgA | 2,5-DIKETO-D-GLUCONIC ACID REDUCTASE (EC 1.1.1.-)                     | 2755     |
| cg2833        | 122<br>136<br>154<br>75<br>81<br>94<br>98 | cysK | O-Acetylserine (Thiol)-Lyase                                          | 532      |
| cg2840        | 80<br>82                                  | actA | BUTYRYL-COA:ACETATE COENZYME A TRANSFERASE                            | 2187     |
| cg3049        | 98                                        | fpr1 | NADPH-dependent ferredoxin reductase                                  | 277      |
| cg3096        | 114<br>83                                 |      | ALDEHYDE DEHYDROGENASE (EC 1.2.1.3)                                   | 4002     |
| cg3100        | 121<br>127<br>141<br>72<br>76             | dnaK | Heat shock protein hsp70                                              | 2581     |
| cg3115        | 99                                        | cysD | sulfate adenylyltransferase subunit 2                                 | 682      |
| cg3119        | 72                                        | fpr2 | NADPH-dependent ferredoxin reductase                                  | 2569     |
| cg3182        | 69<br>83                                  | cop1 | Trehalose corynomycolyl transferase2                                  | 3095     |
