# Supplementary material for: Peak intensity prediction in MALDI-TOF mass spectrometry: A machine learning study to support quantitative proteomics
Source: PubMed Central journal article supplement (PMC2600826; doi:10.1186/1471-2105-9-443), 2008-10-20
Supplement: 1471-2105-9-443-S4.pdf [file 1471-2105-9-443-S4.pdf]

| coding region | MOWSE score | name  | description                                         | GenDB ID | coverage   | MC | min. mass tolerance | modifications | parameter sets |
|---------------|-------------|-------|-----------------------------------------------------|----------|------------|----|---------------------|---------------|----------------|
| cg0004        | 200         | dnaN  | DNA polymerase III, beta subunit                    | 437      | 52%: 15/27 | 1  | 50ppm               | Oxidation (M) | 42/42          |
| cg0040        | 67          |       | putative secreted protein                           | 2631     | 18%: 6/40  | 1  | 50ppm               | None          | 30/42          |
| cg0131        | 86          |       | putative oxidoreductase                             | 2004     | 25%: 8/24  | 1  | 200ppm              | None          | 23/42          |
| cg0203        | 77          | iolE  | putative inosose dehydratase                        | 2355     | 28%: 8/63  | 0  | 200ppm              | None          | 11/42          |
| cg0204        | 101         | iolG  | myo-inositol 2-dehydrogenase                        | 1230     | 35%: 11/68 | 0  | 100ppm              | Oxidation (M) | 35/42          |
| cg0267        | 114         | pat   | phenylalanine aminotransferase                      | 3444     | 30%: 9/39  | 0  | 50ppm               | Oxidation (M) | 38/42          |
| cg0307        | 88          | asd   | aspartate-semialdehyde dehydrogenase (EC 1.2.1.11)  | 254      | 27%: 6/28  | 0  | 100ppm              | None          | 36/42          |
| cg0310        | 110         | katA  | catalase (EC 1.11.1.6)                              | 1894     | 31%: 13/29 | 0  | 500ppm              | Oxidation (M) | 12/42          |
|               | 155         |       |                                                     |          | 28%: 10/19 | 0  | 100ppm              | Oxidation (M) | 32/42          |
|               | 332         |       |                                                     |          | 71%: 34/65 | 1  | 50ppm               | Oxidation (M) | 42/42          |
| cg0387        | 152         | adhE  | putative zinc-type alcohol dehydrogenase transmemb  | 2260     | 47%: 13/49 | 0  | 150ppm              | Oxidation (M) | 39/42          |
| cg0391        | 99          | rmlB2 | putative dtdp-glucose 4,6-dehydratase               | 2555     | 35%: 9/30  | 1  | 150ppm              | None          | 36/42          |
| cg0400        | 130         | adhC  | alcohol dehydrogenase, class c (EC 1.1.1.2)         | 819      | 47%: 11/58 | 0  | 100ppm              | Oxidation (M) | 36/42          |
| cg0413        | 83          | cmt1  | Trehalose corynomycolyl transferase                 | 243      | 26%: 9/45  | 1  | 50ppm               | Oxidation (M) | 38/42          |
|               | 99          |       |                                                     |          | 29%: 10/45 | 1  | 50ppm               | Oxidation (M) | 35/42          |
| cg0441        | 237         | lpd   | dihydrolipoamide dehydrogenase (EC 1.8.1.4)         | 519      | 37%: 15/21 | 0  | 100ppm              | Oxidation (M) | 42/42          |
|               | 244         |       |                                                     |          | 47%: 20/32 | 1  | 50ppm               | Oxidation (M) | 42/42          |
| cg0482        | 129         | gpmA  | phosphoglyceromutase 1 (EC 5.4.2.1)                 | 127      | 43%: 8/29  | 0  | 100ppm              | None          | 42/42          |
| cg0488        | 89          | ppx1  | exopolyphosphatase                                  | 4068     | 21%: 6/20  | 0  | 100ppm              | None          | 37/42          |
| cg0548        | 66          | menB  | dihydroxynaphthonic acid synthase (EC 4.1.3.36)     | 2502     | 18%: 6/21  | 1  | 100ppm              | None          | 25/42          |
| cg0583        | 134         | fusA  | elongation factor g                                 | 1897     | 20%: 12/20 | 1  | 50ppm               | Oxidation (M) | 39/42          |
|               | 168         |       |                                                     |          | 28%: 16/27 | 1  | 100ppm              | Oxidation (M) | 36/42          |
|               | 259         |       |                                                     |          | 40%: 22/50 | 0  | 100ppm              | Oxidation (M) | 42/42          |
| cg0587        | 117         | tuf   | elongation factor tu                                | 2252     | 37%: 9/30  | 0  | 100ppm              | Oxidation (M) | 41/42          |
|               | 120         |       |                                                     |          | 37%: 9/28  | 0  | 100ppm              | Oxidation (M) | 35/42          |
| cg0650        | 71          |       | secreted protein                                    | 1117     | 30%: 6/46  | 0  | 50ppm               | Oxidation (M) | 35/42          |
|               | 82          |       |                                                     |          | 38%: 6/41  | 0  | 50ppm               | Oxidation (M) | 31/42          |
| cg0655        | 110         | rpoA  | DNA-directed RNA polymerase alpha subunit           | 3122     | 27%: 8/15  | 1  | 50ppm               | Oxidation (M) | 42/42          |
|               | 127         |       |                                                     |          | 28%: 9/16  | 1  | 50ppm               | Oxidation (M) | 42/42          |
| cg0699        | 202         | guaB2 | inositol-monophosphate dehydrogenase (EC 1.1.1.205) | 1879     | 61%: 25/39 | 1  | 750ppm              | None          | 6/42           |
|               | 318         |       |                                                     |          | 61%: 32/43 | 1  | 50ppm               | Oxidation (M) | 42/42          |

| coding region | MOWSE score              | name  | description                                                 | GenDB ID | coverage                                           | MC               | min. mass tolerance                 | modifications                  | parameter sets                   |
|---------------|--------------------------|-------|-------------------------------------------------------------|----------|----------------------------------------------------|------------------|-------------------------------------|--------------------------------|----------------------------------|
| cg0700        | 117                      | guaB3 | IMP dehydrogenase/GMP reductase C terminus                  | 3013     | 30%: 9/22                                          | 1                | 50ppm                               | None                           | 42/42                            |
| cg0726        | 85                       |       | secreted lipoprotein                                        | 444      | 33%: 5/22                                          | 0                | 50ppm                               | None                           | 32/42                            |
| cg0737        | 110<br>85                | metQ  | ABC-type methionine transporter, substrate-binding protein  | 91       | 45%: 8/52<br>42%: 7/70                             | 1<br>1           | 50ppm<br>50ppm                      | None<br>None                   | 42/42<br>34/42                   |
| cg0750        | 101                      | folD  | methylenetetrahydrofolate dehydrogenase                     | 2950     | 32%: 13/28                                         | 1                | 750ppm                              | None                           | 6/42                             |
| cg0755        | 88                       | metY  | O-acetylhomoserine sulfhydrylase                            | 1136     | 22%: 8/21                                          | 1                | 150ppm                              | None                           | 42/42                            |
| cg0760        | 125                      | prpB2 | probable methylisocitric acid lyase                         | 1886     | 38%: 12/29                                         | 1                | 150ppm                              | Oxidation (M)                  | 36/42                            |
| cg0779        | 134                      | trpS  | tryptophan tRNA synthetase                                  | 1752     | 32%: 9/31                                          | 0                | 50ppm                               | None                           | 42/42                            |
| cg0792        | 68                       |       | Thioredoxin domain-containing protein                       | 952      | 31%: 8/46                                          | 1                | 200ppm                              | None                           | 22/42                            |
| cg0802        | 117                      | accBC | (Q54119) biotin carboxylase and biotin carboxyl ca          |          | 24%: 11/14                                         | 1                | 500ppm                              | None                           | 12/42                            |
|               | 126                      |       |                                                             | 24       | 35%: 22/35                                         | 1                | 500ppm                              | Oxidation (M)                  | 12/42                            |
|               | 151                      |       |                                                             | 24       | 41%: 24/38                                         | 1                | 500ppm                              | Oxidation (M)                  | 12/42                            |
|               | 279                      |       |                                                             | 24       | 38%: 22/28                                         | 1                | 100ppm                              | Oxidation (M)                  | 42/42                            |
|               | 70                       |       |                                                             | 24       | 15%: 7/24                                          | 1                | 50ppm                               | None                           | 13/42                            |
| cg0835        | 70                       | msiK2 | ABC-type sugar transport systems, ATPase component          | 477      | 18%: 6/28                                          | 0                | 100ppm                              | Oxidation (M)                  | 7/42                             |
| cg0854        | 66                       | pmmA  | phosphomannomutase (EC 5.4.2.8)                             | 3556     | 16%: 6/28                                          | 0                | 200ppm                              | None                           | 9/42                             |
| cg0867        | 98                       |       | Ribosome-associated protein Y (PSrp-1)                      | 1647     | 46%: 8/31                                          | 1                | 150ppm                              | None                           | 27/42                            |
| cg0873        | 165<br>179               | aroA  | 3-phosphoshikimate 1-carboxyvinyltransferase                | 2244     | 47%: 15/38<br>43%: 14/30                           | 1<br>1           | 100ppm<br>100ppm                    | Oxidation (M)<br>Oxidation (M) | 42/42<br>42/42                   |
| cg0898        | 104<br>91                |       | Pyridoxine biosynthesis enzyme                              | 296      | 41%: 8/48<br>29%: 7/15                             | 0<br>1           | 150ppm<br>100ppm                    | None<br>Oxidation (M)          | 24/42<br>15/42                   |
| cg0924        | 77<br>88<br>95           |       | ABC-type cobalamin/Fe3+-siderophores transport sys          | 2856     | 24%: 5/27<br>26%: 5/14<br>32%: 7/44                | 0<br>0<br>1      | 50ppm<br>50ppm<br>50ppm             | None<br>Oxidation (M)<br>None  | 30/42<br>28/42<br>36/42          |
| cg0967        | 115                      | cysQ  | 3'-Phosphoadenosine 5'-phosphosulfate (PAPS) 3'-phosphatase | 1502     | 36%: 7/26                                          | 0                | 50ppm                               | None                           | 42/42                            |
| cg0984        | 161<br>246               | purH  | (Q9RHX6) 5'-phosphoribosyl-5-aminoimidazole-4-carb          | 3001     | 27%: 11/14<br>39%: 18/24                           | 1<br>1           | 50ppm<br>50ppm                      | Oxidation (M)<br>Oxidation (M) | 42/42<br>42/42                   |
| cg1037        | 69                       | rpf2  | RPF2 precursor, secreted protein                            | 190      | 20%: 5/14                                          | 1                | 50ppm                               | None                           | 42/42                            |
| cg1111        | 109<br>127<br>131<br>142 | eno   | enolase (EC 4.2.1.11) (2-phosphoglycerate dehydrat          | 973      | 32%: 11/26<br>23%: 7/12<br>23%: 7/12<br>33%: 10/18 | 1<br>0<br>0<br>1 | 500ppm<br>100ppm<br>50ppm<br>100ppm | None<br>None<br>None<br>None   | 12/42<br>39/42<br>42/42<br>42/42 |

| coding region | MOWSE score       | name  | description                                                              | GenDB ID | coverage                               | MC          | min. mass tolerance        | modifications                  | parameters             |
|---------------|-------------------|-------|--------------------------------------------------------------------------|----------|----------------------------------------|-------------|----------------------------|--------------------------------|------------------------|
| cg1113        | 76                |       | conserved hypothetical protein                                           | 2358     | 38%: 6/19                              | 0           | 500ppm                     | Oxidation (M)                  | 26/42                  |
| cg1133        | 98                | glyA  | Serine Hydroxymethyltransferase                                          | 2386     | 41%: 12/48                             | 0           | 750ppm                     | None                           | 6/42                   |
| cg1145        | 124               | fum   | fumarate hydratase (EC 4.2.1.2)                                          | 5        | 36%: 18/43                             | 0           | 750ppm                     | Oxidation (M)                  | 6/42                   |
| cg1171        | 130<br>95         |       | Predicted GTPase                                                         | 3579     | 37%: 9/36<br>27%: 7/20                 | 0<br>0      | 50ppm<br>200ppm            | Oxidation (M)<br>Oxidation (M) | 41/42<br>31/42         |
| cg1206        | 77                | PEP   | phosphonomutase or related enzyme                                        | 2961     | 34%: 8/32                              | 1           | 50ppm                      | Oxidation (M)                  | 30/42                  |
| cg1283        | 67                | aroE2 | putative shikimate/quininate 5-dehydrogenase                             | 2344     | 20%: 4/16                              | 0           | 50ppm                      | None                           | 12/42                  |
| cg1322        | 86                |       | conserved hypothetical protein                                           | 2682     | 28%: 5/13                              | 1           | 50ppm                      | None                           | 35/42                  |
| cg1334        | 75                | lysA  | diaminopimelate decarboxylase                                            | 582      | 37%: 11/53                             | 0           | 750ppm                     | Oxidation (M)                  | 6/42                   |
| cg1343        | 106               | narH  | probable respiratory nitrate reductase oxidoreduct                       | 1098     | 15%: 6/10                              | 0           | 50ppm                      | None                           | 42/42                  |
| cg1355        | 127<br>69         | prfA  | peptide chain release factor 1 (RF-1)                                    | 3754     | 50%: 13/40<br>17%: 4/11                | 1<br>0      | 150ppm<br>100ppm           | Oxidation (M)<br>None          | 39/42<br>12/42         |
| cg1365        | 86                | atpH  | H+-ATPase delta subunit                                                  | 693      | 36%: 8/33                              | 1           | 150ppm                     | None                           | 40/42                  |
| cg1366        | 135<br>188<br>196 | atpA  | probable ATP synthase alpha chain protein                                | 177      | 26%: 13/32<br>46%: 19/26<br>49%: 23/30 | 1<br>1<br>1 | 100ppm<br>750ppm<br>750ppm | None<br>None<br>Oxidation (M)  | 42/42<br>6/42<br>19/42 |
| cg1367        | 90<br>96          | atpG  | ATP synthase gamma subunit (EC 3.6.1.34)                                 | 728      | 23%: 6/21<br>23%: 7/16                 | 0<br>0      | 100ppm<br>50ppm            | None<br>Oxidation (M)          | 28/42<br>34/42         |
| cg1368        | 111               | atpD  | ATP synthase beta subunit                                                | 1880     | 26%: 10/38                             | 0           | 50ppm                      | Oxidation (M)                  | 36/42                  |
| cg1404        | 98<br>99          | gatA  | probable glu-tRNA (GLN) amidotransferase (subunit A)                     | 1443     | 20%: 6/16<br>31%: 13/30                | 0<br>0      | 100ppm<br>750ppm           | None<br>Oxidation (M)          | 42/42<br>6/42          |
| cg1409        | 80                | pfkA  | 6-phosphofructokinase                                                    | 392      | 26%: 8/25                              | 0           | 500ppm                     | Oxidation (M)                  | 25/42                  |
| cg1418        | 113               |       | ABC-type cobalamin/Fe3+-siderophores transport system secreted component | 2868     | 31%: 8/37                              | 0           | 50ppm                      | None                           | 41/42                  |
| cg1420        | 168<br>177        | gatB  | probable GLU-tRNA (GLN) amidotransferase subunit B pr                    | 3833     | 31%: 10/23<br>40%: 13/24               | 0<br>1      | 50ppm<br>50ppm             | None<br>None                   | 42/42<br>42/42         |
| cg1453        | 141               | leuB  | 3-isopropylmaltate dehydrogenase (EC 1.1.1.85)                           | 3348     | 47%: 11/58                             | 0           | 150ppm                     | None                           | 35/42                  |
| cg1514        | 91                |       | secreted protein                                                         | 1513     | 34%: 9/65                              | 1           | 150ppm                     | Oxidation (M)                  | 42/42                  |
| cg1531        | 100<br>174        | rpsA  | 30S ribosomal protein S1                                                 | 2206     | 27%: 11/34<br>32%: 17/35               | 0<br>1      | 500ppm<br>200ppm           | Oxidation (M)<br>Oxidation (M) | 11/42<br>42/42         |
| cg1574        | 80                | pheS  | phenylalanyl-tRNA synthetase alpha chain                                 | 698      | 19%: 5/12                              | 0           | 100ppm                     | Oxidation (M)                  | 13/42                  |
| cg1577        | 80<br>94          |       | putative secreted hydrolase                                              | 394      | 32%: 7/80<br>32%: 7/57                 | 0<br>0      | 100ppm<br>50ppm            | None<br>None                   | 29/42<br>32/42         |

| coding region | MOWSE score | name       | description                                                            | GenDB ID | coverage   | MC    | min. mass tolerance | modifications | parameter sets |
|---------------|-------------|------------|------------------------------------------------------------------------|----------|------------|-------|---------------------|---------------|----------------|
| cg1598        | 68          |            | sugar phosphatase of the HAD superfamily                               | 2641     | 15%: 4/11  | 0     | 50ppm               | None          | 16/42          |
| cg1630        | 79          |            | putative signal transduction protein, FHA domain                       | 2573     | 39%: 5/20  | 1     | 50ppm               | None          | 28/42          |
| cg1692        | 85          | pimT       | SAM-dependent methyltransferase involved in tRNA-Met maturation        | 2529     | 26%: 8/31  | 1     | 150ppm              | None          | 30/42          |
| cg1735        | 145         |            | secreted cell wall-associated hydrolase (invasion-associated protein)  | 2421     | 26%: 14/43 | 1     | 50ppm               | Oxidation (M) | 40/42          |
|               | 183         | 31%: 16/42 |                                                                        |          | 1          | 50ppm | Oxidation (M)       | 42/42         |                |
|               | 274         | 38%: 24/46 |                                                                        |          | 1          | 50ppm | Oxidation (M)       | 42/42         |                |
| cg1762        | 125         | sufC       | Iron-regulated ABC transporter ATPase subunit                          | 1407     | 42%: 7/18  | 0     | 50ppm               | Oxidation (M) | 42/42          |
| cg1774        | 65          | tkt        | transketolase (EC 2.2.1.1)                                             | 2589     | 16%: 8/32  | 0     | 500ppm              | Oxidation (M) | 6/42           |
| cg1789        | 113         | tpi        | triosephosphate isomerase                                              | 3400     | 38%: 9/30  | 1     | 100ppm              | None          | 42/42          |
|               | 114         |            |                                                                        |          | 38%: 9/32  | 1     | 50ppm               | None          | 42/42          |
| cg1790        | 243         | pgk        | phosphoglycerate kinase (EC 2.7.2.3)                                   | 489      | 57%: 13/28 | 0     | 100ppm              | None          | 42/42          |
| cg1791        | 102         | gap        | glyceraldehyde-3-phosphate dehydrogenase                               | 1677     | 16%: 8/18  | 1     | 100ppm              | None          | 29/42          |
|               | 176         |            |                                                                        |          | 53%: 23/45 | 1     | 750ppm              | Oxidation (M) | 6/42           |
| cg1814        | 101         | carA       | carbamoyl phosphate synthase small subunit                             | 3239     | 34%: 9/31  | 0     | 100ppm              | Oxidation (M) | 34/42          |
|               | 130         |            |                                                                        |          | 35%: 8/26  | 0     | 100ppm              | None          | 40/42          |
| cg1815        | 119         | pyrC       | putative dihydroorotase (EC 3.5.2.3)                                   | 968      | 22%: 7/7   | 1     | 100ppm              | Oxidation (M) | 42/42          |
|               | 188         |            |                                                                        |          | 43%: 16/32 | 0     | 150ppm              | Oxidation (M) | 36/42          |
|               | 68          |            |                                                                        |          | 29%: 11/33 | 0     | 750ppm              | Oxidation (M) | 6/42           |
| cg1817        | 75          | pyrR       | Pyrimidine operon attenuation protein/uracil phosphoribosyltransferase | 2595     | 38%: 6/22  | 1     | 50ppm               | Oxidation (M) | 11/42          |
| cg1825        | 69          | efp        | Translation elongation factor P/translation initiation factor eIF-5A   | 4023     | 28%: 5/14  | 0     | 100ppm              | Oxidation (M) | 13/42          |
| cg1826        | 313         | pepQ       | XAA-PRO aminopeptidase (EC 3.4.11.9)                                   | 1708     | 69%: 16/28 | 0     | 50ppm               | None          | 42/42          |
| cg1855        | 124         | hisS       | histidyl-tRNA synthetase (EC 6.1.1.21)                                 | 3461     | 37%: 14/29 | 0     | 750ppm              | Oxidation (M) | 6/42           |
| cg2057        | 108         |            | putative secreted protein                                              | 376      | 35%: 9/30  | 1     | 50ppm               | None          | 42/42          |
| cg2091        | 152         | ppgK       | polyphosphate glucokinase (EC 2.7.1.2)                                 | 1389     | 44%: 8/15  | 0     | 50ppm               | Oxidation (M) | 42/42          |
| cg2103        | 89          | dtxR       | iron dependent regulatory protein - DTXR homolog                       | 1654     | 52%: 12/43 | 0     | 750ppm              | Oxidation (M) | 5/42           |
| cg2117        | 193         | ptsI       | phosphoenolpyruvate: sugar phosphotransferase system enzymei           | 1018     | 38%: 19/47 | 1     | 200ppm              | None          | 30/42          |
| cg2137        | 65          | gluB       | glutamate secreted binding protein                                     | 2765     | 35%: 7/62  | 1     | 100ppm              | Oxidation (M) | 9/42           |
| cg2151        | 142         |            | Similar to phage shock protein A                                       | 4362     | 47%: 12/24 | 0     | 150ppm              | Oxidation (M) | 33/42          |
| cg2217        | 70          | frr        | ribosome recycling factor                                              | 1690     | 29%: 5/7   | 1     | 100ppm              | Oxidation (M) | 20/42          |
| cg2221        | 149         | tsf        | translagtion elongation factor TS (EF-TS)                              | 2983     | 68%: 15/46 | 1     | 200ppm              | Oxidation (M) | 36/42          |
|               | 85          |            |                                                                        |          | 44%: 8/37  | 1     | 150ppm              | None          | 39/42          |

| coding region | MOWSE score | name | description                                                                 | GenDB ID      | coverage   | MC | min. mass tolerance | modifications | parameter sets |
|---------------|-------------|------|-----------------------------------------------------------------------------|---------------|------------|----|---------------------|---------------|----------------|
| cg2222        | 94          | rpsB | 30S ribosomal protein S2                                                    | 3216          | 32%: 9/26  | 1  | 100ppm              | Oxidation (M) | 32/42          |
| cg2275        | 156         |      | putative F0F1-type ATP synthase b subunit                                   | 3051          | 54%: 17/69 | 1  | 50ppm               | None          | 42/42          |
| cg2291        | 142         | pyk  | pyruvate kinase                                                             | 1271          | 25%: 10/14 | 1  | 150ppm              | None          | 30/42          |
| cg2297        | 129         | hisF | probable cyclase (imidazole glycerol phosphate synthase-subunit)            | 2718          | 46%: 9/23  | 1  | 100ppm              | None          | 36/42          |
| cg2305        | 100         | hisD | histidinol dehydrogenase (EC 1.1.1.23)                                      | 2680          | 21%: 8/19  | 1  | 100ppm              | None          | 26/42          |
| cg2363        | 68          |      | conserved hypothetical protein                                              | 554           | 44%: 4/25  | 0  | 50ppm               | Oxidation (M) | 9/42           |
| cg2366        | 121         | ftsZ | Cell division GTPase                                                        | 2356          | 26%: 8/11  | 1  | 50ppm               | Oxidation (M) | 40/42          |
| cg2391        | 126         | aroG | phospho-2-dehydro-3-deoxyheptonate aldolase                                 | 3899          | 29%: 10/33 | 0  | 100ppm              | Oxidation (M) | 40/42          |
| cg2418        | 80          | ilvE | branched-chain amino acid aminotransferase                                  | 1975          | 17%: 5/11  | 0  | 100ppm              | Oxidation (M) | 21/42          |
|               | 96          |      |                                                                             |               | 27%: 7/28  | 0  | 50ppm               | Oxidation (M) | 19/42          |
| cg2429        | 117         | glnA | glutamine synthetase I (EC 6.3.1.2)                                         | 386           | 28%: 10/19 | 1  | 100ppm              | Oxidation (M) | 42/42          |
|               | 120         |      |                                                                             |               | 25%: 9/17  | 1  | 50ppm               | None          | 42/42          |
| cg2466        | 222         | aceE | pyruvate dehydrogenase E1 component (EC 1.2.4.1)                            | 3330          | 28%: 23/29 | 1  | 100ppm              | Oxidation (M) | 42/42          |
| cg2610        | 102         |      | ABC-type dipeptide/oligopeptide/nickel transport system, secreted component | 2828          | 22%: 9/45  | 1  | 50ppm               | None          | 37/42          |
| cg2658        | 79          | rpi  | possible phosphopentose isomerase                                           | 3661          | 45%: 5/29  | 0  | 150ppm              | None          | 28/42          |
| cg2692        | 104         |      | Predicted thioesterase                                                      | 3890          | 53%: 8/35  | 1  | 100ppm              | None          | 39/42          |
| cg2705        | 128         | amyE | maltose-binding protein precursor                                           | 1319          | 30%: 10/29 | 0  | 50ppm               | Oxidation (M) | 42/42          |
|               | 144         |      |                                                                             |               | 36%: 14/32 | 1  | 50ppm               | Oxidation (M) | 42/42          |
|               | 151         |      |                                                                             |               | 46%: 14/66 | 0  | 50ppm               | Oxidation (M) | 40/42          |
|               | 154         |      |                                                                             |               | 49%: 18/74 | 1  | 50ppm               | Oxidation (M) | 40/42          |
|               | 193         |      |                                                                             |               | 60%: 21/67 | 1  | 100ppm              | Oxidation (M) | 42/42          |
|               | 194         |      |                                                                             |               | 58%: 20/58 | 1  | 100ppm              | Oxidation (M) | 42/42          |
|               | 247         |      |                                                                             |               | 57%: 19/55 | 1  | 50ppm               | None          | 42/42          |
|               | 265         |      |                                                                             |               | 65%: 21/59 | 1  | 100ppm              | None          | 42/42          |
|               | 75          |      |                                                                             |               | 21%: 6/10  | 1  | 250ppm              | None          | 19/42          |
| 78            | 28%: 11/64  | 1    | 50ppm                                                                       | Oxidation (M) | 27/42      |    |                     |               |                |
| cg2720        | 116         | lppS | secreted lipoprotein ErfK/YbiS/YcfS/YnhG family                             | 3516          | 32%: 10/42 | 1  | 100ppm              | None          | 39/42          |
| cg2736        | 74          | bcp  | probable bacterioferritin comigratory oxidoreductase                        | 187           | 46%: 5/16  | 1  | 50ppm               | Oxidation (M) | 20/42          |
| cg2751        | 80          |      | Xanthosine triphosphate pyrophosphatase                                     | 3153          | 40%: 6/28  | 1  | 50ppm               | None          | 30/42          |
| cg2830        | 69          | pduO | adenosylcobalamin-dependent diol dehydratase gamma                          | 1034          | 21%: 4/7   | 1  | 100ppm              | None          | 32/42          |
| cg2833        | 98          | cysK | O-Acetylserine (Thiol)-Lyase                                                | 532           | 21%: 6/9   | 1  | 100ppm              | None          | 42/42          |
| cg2836        | 150         | sucD | succinyl-CoA synthetase alpha subunit                                       | 129           | 50%: 9/24  | 0  | 100ppm              | Oxidation (M) | 42/42          |
| cg2840        | 75          | actA | butyryl-CoA: acetate coenzyme A transferase                                 | 2187          | 27%: 7/19  | 0  | 750ppm              | None          | 9/42           |
|               | 93          |      |                                                                             |               | 28%: 11/27 | 1  | 150ppm              | Oxidation (M) | 36/42          |
|               | 97          |      |                                                                             |               | 33%: 10/37 | 0  | 250ppm              | Oxidation (M) | 24/42          |

| coding region | MOWSE score | name | description                                                                                         | GenDB ID | coverage   | MC | min. mass tolerance | modifications | parameter sets |
|---------------|-------------|------|-----------------------------------------------------------------------------------------------------|----------|------------|----|---------------------|---------------|----------------|
| cg2856        | 148         | purM | phosphoribosyl aminoimidazole synthetase                                                            | 2315     | 48%: 13/59 | 0  | 150ppm              | Oxidation (M) | 42/42          |
| cg2863        | 128         | purQ | phosphoribosylformyl glycinamide synthase                                                           | 82       | 55%: 8/29  | 0  | 100ppm              | Oxidation (M) | 39/42          |
| cg2865        | 70          | purS | phosphoribosylformyl glycinamide synthase component                                                 | 2802     | 49%: 4/16  | 1  | 50ppm               | None          | 23/42          |
| cg2874        | 126         | purC | phosphoribosylaminoimidazole-succinocarboxamide synthase                                            | 2484     | 40%: 10/34 | 0  | 100ppm              | Oxidation (M) | 38/42          |
| cg2891        | 103         | poxB | pyruvate dehydrogenase                                                                              | 3835     | 16%: 8/15  | 1  | 50ppm               | None          | 42/42          |
| cg2900        | 149         | ddh  | mesa-diaminopimelate dehydrogenase                                                                  | 3514     | 40%: 11/21 | 1  | 100ppm              | Oxidation (M) | 42/42          |
|               | 67          |      |                                                                                                     |          | 39%: 10/26 | 1  | 750ppm              | Oxidation (M) | 6/42           |
| cg3049        | 130         | fpr1 | NADPH-dependent ferredoxin reductase                                                                | 277      | 45%: 20/30 | 1  | 750ppm              | Oxidation (M) | 12/42          |
| cg3050        | 90          |      | acyltransferase                                                                                     | 4123     | 35%: 6/24  | 0  | 100ppm              | Oxidation (M) | 29/42          |
| cg3068        | 123         | fda  | fructose-bisphosphate aldolase                                                                      | 875      | 46%: 9/48  | 0  | 150ppm              | None          | 28/42          |
|               | 211         |      |                                                                                                     |          | 66%: 13/53 | 0  | 50ppm               | None          | 42/42          |
| cg3079        | 129         | clpB | probable ATP-dependent protease (heat shock protein)                                                | 936      | 23%: 19/40 | 1  | 150ppm              | Oxidation (M) | 33/42          |
| cg3096        | 188         |      | aldehyde dehydrogenase (EC 1.2.1.3)                                                                 | 4002     | 47%: 20/54 | 1  | 150ppm              | Oxidation (M) | 36/42          |
| cg3100        | 245         | dnaK | Heat shock protein hsp70                                                                            | 2581     | 39%: 15/29 | 0  | 100ppm              | None          | 42/42          |
|               | 257         |      |                                                                                                     |          | 41%: 16/28 | 0  | 150ppm              | None          | 36/42          |
|               | 69          |      |                                                                                                     |          | 23%: 8/34  | 0  | 500ppm              | None          | 5/42           |
| cg3182        | 159         | cop1 | Trehalose corynomycolyl transferase                                                                 | 3095     | 25%: 13/61 | 0  | 50ppm               | None          | 42/42          |
| cg3197        | 102         | psp5 | Putative secreted protein                                                                           | 2257     | 15%: 8/44  | 0  | 50ppm               | None          | 38/42          |
| cg3214        | 66          |      | conserved hypothetical protein                                                                      | 762      | 30%: 7/52  | 1  | 50ppm               | None          | 21/42          |
| cg3264        | 106         |      | conserved hypothetical protein                                                                      | 2594     | 38%: 15/37 | 1  | 100ppm              | Oxidation (M) | 37/42          |
| cg3319        | 70          |      | Uncharacterized enzyme related to sulfurtransferases                                                | 1434     | 18%: 8/33  | 1  | 250ppm              | None          | 24/42          |
| cg3350        | 122         | hpaG | putative bifunctional enzyme 2-hydroxyhepta-2,4-diene-1,7-dioatesomerase5-carboxymethyl-2-oxo-hex-3 | 3279     | 40%: 8/37  | 0  | 50ppm               | None          | 41/42          |
| cg3423        | 102         | trxC | thioredoxin                                                                                         | 3758     | 54%: 6/19  | 1  | 100ppm              | None          | 41/42          |
