# Supplementary material for: Peak intensity prediction in MALDI-TOF mass spectrometry: A machine learning study to support quantitative proteomics
Source: PubMed Central journal article supplement (PMC2600826; doi:10.1186/1471-2105-9-443), 2008-10-20
Supplement: 1471-2105-9-443-S9.pdf [file 1471-2105-9-443-S9.pdf]

| $r$ / rss  | step 1     | step 2     | step 3      | step 4     | step 5     | step 6       | step 7     | step 8     | step 9     | step 10    | step 11    | step 12 |
|------------|------------|------------|-------------|------------|------------|--------------|------------|------------|------------|------------|------------|---------|
| 0.49 / 502 | GARJ730101 | TANS770108 | VASM830103  | GB500      |            |              |            |            |            |            |            |         |
| 0.55 / 457 | ARGP820102 | CHOC760102 | FAUJ880111  | TANS770105 | NADH010106 | WILM950102   | TANS770105 | R          |            | GB500      |            |         |
| 0.49 / 496 | FAUJ880111 | ROBB760109 | R           | GB500      |            |              |            |            |            |            |            |         |
| 0.51 / 489 | ISOY800102 | QIAN880112 | VASM830103  | NADH010106 | GB500      |              |            |            |            |            |            |         |
| 0.54 / 466 | ISOY800103 | VASM830103 | NADH010106  | QIAN880112 | WILM950102 | R            |            | GB500      |            |            |            |         |
| 0.56 / 454 | FAUJ830101 | LEVM780106 | OOBM770105  | PALJ810114 | QIAN880127 | RACS820106   | RACS820107 | VASM830103 | NADH010106 | GB500      |            |         |
| 0.54 / 470 | BUNA790103 | CHAM830101 | CHOP7802010 | WOLS870101 | OOBM770104 | VASM830103   | R          |            |            |            |            |         |
| 0.52 / 484 | FAUJ880111 | QIAN880123 | ROBB760109  | WOLS870101 | R          | GB500        |            |            |            |            |            |         |
| 0.48 / 505 | PRAM900101 | RICJ880114 | SNEP660103  | GB500      |            |              |            |            |            |            |            |         |
| 0.49 / 502 | VASM830103 | GB500      |             |            |            |              |            |            |            |            |            |         |
| 0.54 / 466 | QIAN880103 | QIAN880115 | QIAN880123  | QIAN880132 | QIAN880103 | QIAN880104   | R          |            |            | GB500      |            |         |
| 0.50 / 495 | QIAN880133 | VASM830103 | NADH010106  | GB500      |            |              |            |            |            |            |            |         |
| 0.52 / 481 | RICJ880115 | ROBB760102 | VENT840101  | NADH010106 | R          | GB500        |            |            |            |            |            |         |
| 0.56 / 454 | CHOP780214 | GEIM800105 | OOBM770104  | VASM830103 | NADH010106 | WILM950102   | GUOD860101 | BASU050101 | R          |            | GB500      |         |
| 0.56 / 454 | GEIM800109 | NOZY710101 | RACS820114  | RICJ880114 | ROSM880103 | SIMZ760101   | TANS770108 | VASM830103 | AURR980102 | KIMC930101 | WILM950102 | GB500   |
| 0.54 / 471 | VASM830103 | NADH010105 | WILM950102  | GEOR030103 | NADH010106 | GB500        | R          |            |            |            |            |         |
| 0.53 / 474 | FAUJ880111 | ISOY800103 | ZIMJ680101  | NADH010101 | NADH010106 | WILM95010102 | R          |            | GB500      |            |            |         |
| 0.55 / 457 | FAUJ880111 | NAKH920108 | RICJ880104  | RICJ880105 | ROBB760109 | AURR980111   | WILM950103 | R          |            | GB500      |            |         |
| 0.51 / 484 | CHAM830103 | FAUJ880111 | VASM830103  | R          | GB500      |              |            |            |            |            |            |         |
| 0.47 / 509 | PUNT030101 | R          | GB500       |            |            |              |            |            |            |            |            |         |

Table 0.1: Feature selection details: Features from the *aa* feature set selected in each run (rows) in the order of their stepwise addition to the selection. The step numbers show the order of selection. The Pearson's correlation is denoted by  $r^2$ , and rss is the residual sum of squares. The description of features can be found with the Amino Acid Index Database by Kawashima *et al.* (*Nucleic Acids Res* 1999: **27**:368–369).

| $r$ / rss           | step 1 | step 2 | step 3 | step 4 | step 5 | step 6 | step 7 | step 8 | step 9 | step 10 | step 11 |
|---------------------|--------|--------|--------|--------|--------|--------|--------|--------|--------|---------|---------|
| 4 runs [0.28 / 481] | R      | M      | F      | FFT    |        |        |        |        |        |         |         |
| 4 runs [0.28 / 475] | R      | M      | F      | GFG    |        |        |        |        |        |         |         |
| 2 runs [n/a]        | R      | M      | F      | YTe    |        |        |        |        |        |         |         |
| 1 runs [n/a]        | R      | M      | F      | DYN    |        |        |        |        |        |         |         |
| 2 runs [n/a]        | R      | M      | F      | DLH    |        |        |        |        |        |         |         |
| 2 runs [n/a]        | R      | M      | F      | P      | DLH    | TSD    |        |        |        |         |         |
| 3 runs [0.32 / 451] | R      | F      | QQ     | GT     | HP     | ID     | MT     | AFN    | QAK    | QSV     | LHD     |
| 1 runs [n/a]        | R      | F      | MT     | EM     | SV     | KMM    | AGL    |        |        |         |         |
| 1 runs [n/a]        | C      | K      | MF     | AGL    | QSV    | PEC    | aSL    |        |        |         |         |

Table 0.2: Feature selection details: Features from the *seq* feature set selected in different runs (rows) in the order of their stepwise addition to the selection. The step numbers show the order of selection. The Pearson's correlation is denoted by  $r^2$ , and rss is the residual sum of squares.
